# Supplementary material for: Carbonic anhydrase-mimicking metal–organic frameworks built from amino acid and cadmium ions
Source: Royal Society of Chemistry journal article supplement (doi:10.1039/d4dt01456a), 2024-01-01
Supplement: d4dt01456a1.pdf [file d4dt01456a1.pdf]

## Supporting information

### **Carbonic anhydrase-mimicking metal-organic frameworks built from amino acid and cadmium ions**

*Taofeek Ogungbade,<sup>a</sup> Charles Uland,<sup>a</sup> Longji Li,<sup>a</sup> Luhan Wang,<sup>a</sup> Kareena Pansuria,<sup>a</sup> Carolina R elva,<sup>a</sup> Gregory Barn,<sup>a</sup> Simrat Jeet Kaur,<sup>a</sup> Paulin Norris,<sup>b</sup> Bangbo Yan,<sup>\*ab</sup>*

<sup>a</sup>*Department of Chemistry, Western Kentucky University, 1906 College Heights Blvd., Bowling Green, KY 42101, USA.*

<sup>b</sup>*Advanced Materials Institute, Western Kentucky University, 2413 Nashville Rd., Bowling Green, KY 42101, USA.*

Corresponding author: Bangbo Yan (Bangbo.yan@wku.edu)

## Table of Contents

|                                      |    |
|--------------------------------------|----|
| 1. Materials .....                   | 3  |
| 2. Synthesis .....                   | 3  |
| 3. PXRD .....                        | 4  |
| 4. TGA .....                         | 5  |
| 5. X-Ray crystallography .....       | 6  |
| 6. Biomimetic catalysis study .....  | 9  |
| 7. FTIR .....                        | 10 |
| 8 Stability in buffer solution ..... | 11 |
| 9. References .....                  | 12 |

## 1. Materials.

All chemicals and solvents employed were commercially purchased and used without further purification. L-histidine (HIS) hydrochloride monohydrate (99%), cadmium nitrate tetrahydrate ( $\text{Cd}(\text{NO}_3)_2 \cdot 4\text{H}_2\text{O}$ , 99.9%) were purchased from Fisher.

## 2. Synthesis

**Compound 1 [ $\alpha$ -Cd(HIS)]:** 0.1270 g (0.4117 mmol)  $\text{Cd}(\text{NO}_3)_2 \cdot 4\text{H}_2\text{O}$  was mixed with 0.1020 g (0.04866 mmol) L-histidine hydrochloride monohydrate and 0.50 mL 0.5 M KOH in 2.0 mL DI water. The mixture was transferred to a 45 mL Teflon-lined autoclave, sealed and heated at 130 °C for 168 hours. The colorless crystals of **1** were collected by filtration and dried in air (0.0813 g, yield 74.9% based on Cd). CHN analysis (%) exp (clc): C: 26.41 (27.14); H: 2.644 (2.657); N: 15.28 (15.82). IR ( $\text{cm}^{-1}$ ): 3344 (w), 3289 (w), 3161, 3136 (w), 3117, 2932, 2895, 1563 (m), 1472, 1439, 1419, 1233, 1317, 1112, 1040, 972, 889, 850, 822, 798, 658.

**Compound 2 [ $\beta$ -Cd(HIS)]:** 0.1243 g (0.4029 mmol)  $\text{Cd}(\text{NO}_3)_2 \cdot 4\text{H}_2\text{O}$  was mixed with 0.1001 g (0.4775 mmol) L-histidine hydrochloride monohydrate and 5.0 mL 0.5 M KOH in 10.0 mL DI water and 5 mL EtOH. The mixture was transferred to a 45 mL Teflon-lined autoclave, sealed and heated at 130 °C for 72 hours. The colorless crystals of **1** were collected by filtration and dried in air (0.0361 g, yield 34.0% based on Cd). CHN analysis (%) exp (clc): C: 27.24 (27.14); H: 2.648 (2.657); N: 15.875 (15.82). IR ( $\text{cm}^{-1}$ ): 3336 (w), 3280 (w), 3161, 3113, 2926, 2897, 1563(s), 1409, 1318, 1239, 1113, 1050, 882, 820, 775, 662(s).

### 3. PXRD

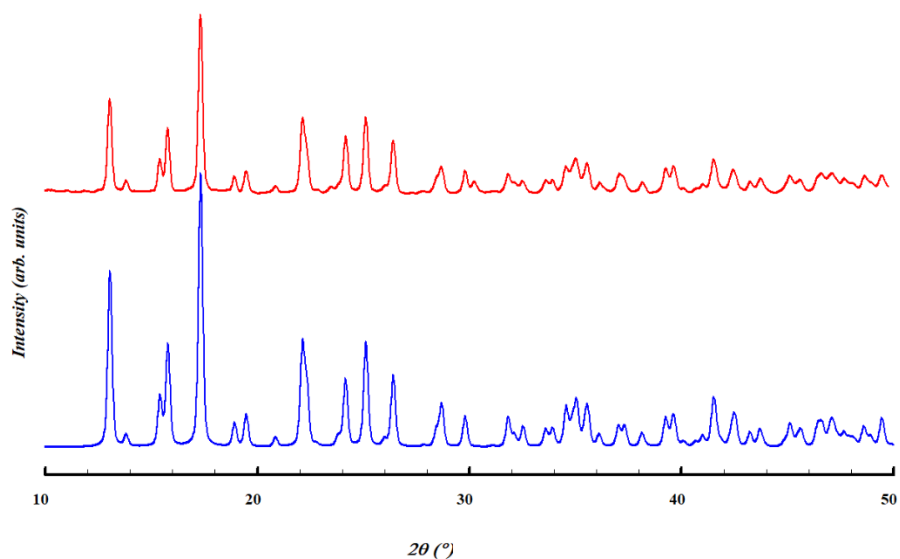

Fig. s1, Simulated PXRD (blue, bottom) from single-crystal XRD and experimented (red, top) PXRD of  $[\alpha\text{-Cd(HIS)}]$  (1).

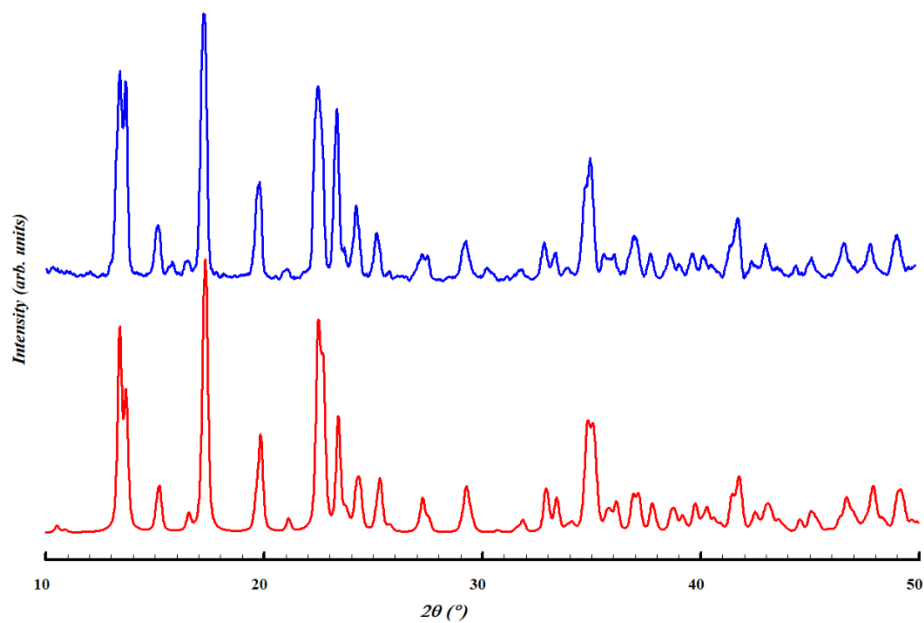

Fig. s2, Simulated PXRD (red, bottom) from single-crystal XRD and experimented (blue, top) PXRD of  $[\beta\text{-Cd(HIS)}]$  (2).

#### 4. TGA

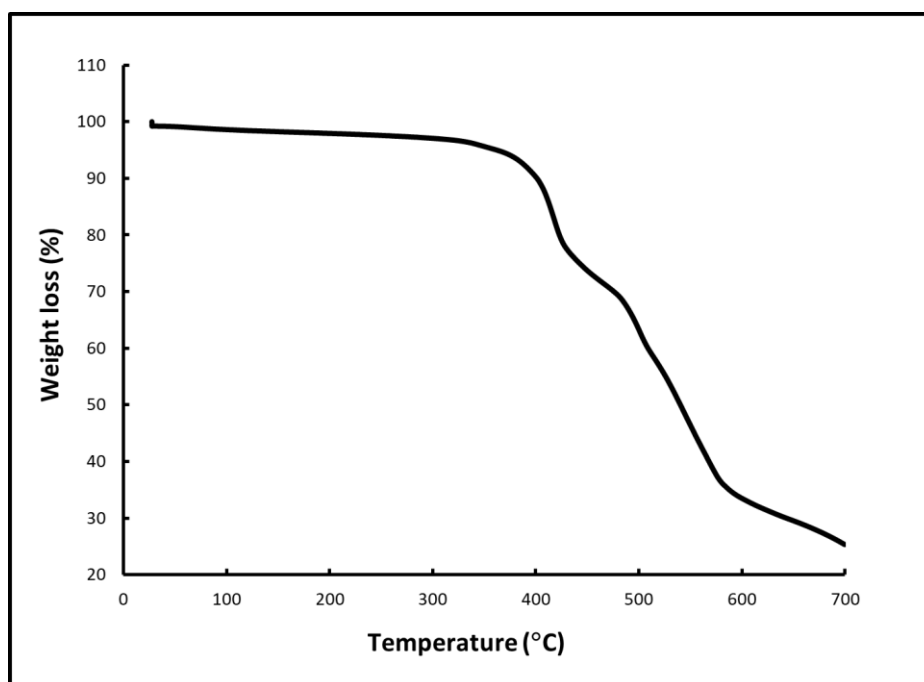

Fig. s3. TGA plot of compound [α-Cd(HIS)] (1).

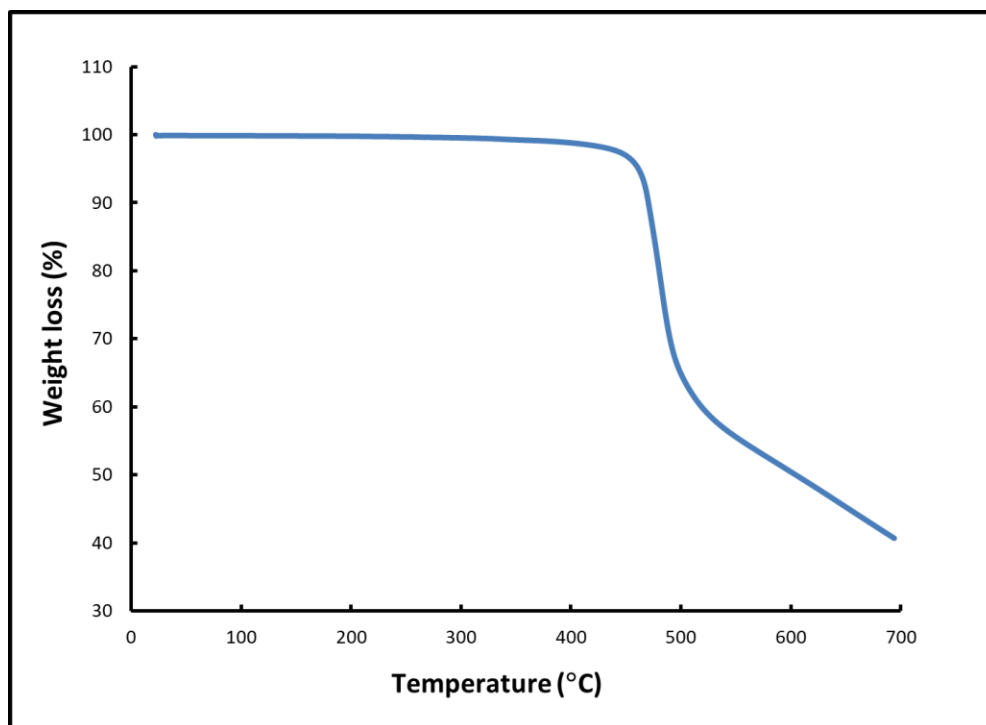

Fig. s4, TGA plot of compound [β-Cd(HIS)] (2).

## 5. X-Ray crystallography

X-ray diffraction data for the title compound were collected on a Bruker Quazar diffractometer with an Apex II CCD area detector. The data were processed with the SAINT software<sup>1</sup> and corrected for absorption with SAD-ABS.<sup>2</sup> The structures were solved by direct methods using SHELXTL V.6.10 package<sup>3</sup> and were refined against  $F^2$  by weighted full-matrix least-squares calculations.<sup>4</sup> All nonhydrogen atoms were refined allowing for anisotropic displacement. Hydrogen atoms of the organic ligand were placed at calculated positions and refined using a riding model. Atomic scattering factors were taken from the International Tables for Crystallography.<sup>5</sup> The crystal data and bond lengths for compounds **1** and **2** are shown in Table s1. Selected hydrogen bonds are shown in Tables s2 and s3.

Table s1. Crystal data and structure refinements

|                                                          | <b>1</b>                                                       | <b>2</b>                                                                      |
|----------------------------------------------------------|----------------------------------------------------------------|-------------------------------------------------------------------------------|
| Formula                                                  | C <sub>6</sub> H <sub>7</sub> N <sub>3</sub> O <sub>2</sub> Cd | C <sub>12</sub> H <sub>14</sub> N <sub>6</sub> O <sub>4</sub> Cd <sub>2</sub> |
| Mol. wt.                                                 | 265.55                                                         | 531.09                                                                        |
| Crystal system                                           | orthorhombic                                                   | Monoclinic                                                                    |
| Space group                                              | <i>P</i> 2 <sub>1</sub> 2 <sub>1</sub> 2 <sub>1</sub>          | <i>P</i> 2 <sub>1</sub>                                                       |
| a (Å)                                                    | 7.7921(8) Å                                                    | 8.13520(10)                                                                   |
| b(Å)                                                     | 8.5071(5) Å                                                    | 10.7178(2)                                                                    |
| c(Å)                                                     | 11.2218(8) Å                                                   | 8.41520(10)                                                                   |
| α(°)                                                     | 90                                                             | 90                                                                            |
| β(°)                                                     | 90                                                             | 90.4940(10)°                                                                  |
| γ(°)                                                     | 90                                                             | 90                                                                            |
| V(Å <sup>3</sup> )                                       | 743.9(1)                                                       | 733.706(19)                                                                   |
| Z                                                        | 4                                                              | 2                                                                             |
| ρ (Mg/m <sup>3</sup> )                                   | 2.371                                                          | 2.404                                                                         |
| μ (mm <sup>-1</sup> )                                    | 2.891                                                          | 2.932                                                                         |
| Wavelength(Å)                                            | 0.71073                                                        | 0.71073                                                                       |
| Temperature(K)                                           | 296                                                            | 296                                                                           |
| Reflections collected/unique [ <i>R</i> <sub>int</sub> ] | 1707/0.0186                                                    | 5292/0.0534                                                                   |
| Goodness-of-fit(F <sup>2</sup> )                         | 1.108                                                          | 1.028                                                                         |
| Final R indices [ <i>I</i> > 2σ( <i>I</i> )]             | <i>R</i> <sub>1</sub> =0.0091, <i>wR</i> <sub>2</sub> = 0.0243 | <i>R</i> <sub>1</sub> = 0.0256, <i>wR</i> <sub>2</sub> = 0.0423               |
| R indices (all data)                                     | <i>R</i> <sub>1</sub> =0.0091, <i>wR</i> <sub>2</sub> = 0.0243 | <i>R</i> <sub>1</sub> = 0.0323, <i>wR</i> <sub>2</sub> = 0.0444               |
| Flack parameter/Friedel coverage (%)                     | 0.01(2)                                                        | 0.015(18)                                                                     |
| Largest diff. peak and hole (e/Å <sup>3</sup> )          | 0.202 and -0.198                                               | 0.515 and -0.490                                                              |

Table s2, Selected hydrogen bonds [ $\text{\AA}$  and  $^\circ$ ] for compound **1**

| D-H...A              | d(D-H) | d(H...A) | d(D...A) | $\angle$ DHA |
|----------------------|--------|----------|----------|--------------|
| N(3)-H(1N)...O(1)#2  | 0.82   | 2.54     | 3.198    | 138          |
| C(1)-H(009)...O(1)#1 | 0.93   | 2.44     | 3.278    | 150          |
| C(1)-H(009)...O(2)#3 | 0.93   | 2.55     | 3.121    | 120          |

Symmetry transformations used to generate equivalent atoms:

$$\#1 = -1+x,y,z$$

$$\#2 = 3/2-x,1-y,1/2+z$$

$$\#3 = -1/2+x,3/2-y,1-z$$

Table s3, Selected hydrogen bonds [ $\text{\AA}$  and  $^\circ$ ] for compound **2**

| D-H...A             | d(D-H) | d(H...A) | d(D...A) | $\angle$ DHA |
|---------------------|--------|----------|----------|--------------|
| N(3)-H(3A)...O(1)#1 | 0.90   | 2.45     | 3.0258   | 122          |
| N(3)-H(3B)...O(4)#2 | 0.90   | 2.27     | 3.1660   | 170          |
| N(6)-H(6B)...N(5)   | 0.90   | 2.32     | 3.0938   | 144          |

Symmetry transformations used to generate equivalent atoms:

$$\#1 = 1-x,1/2+y,1-z$$

$$\#2 = x,y,1+z$$



## 6. Biomimetic catalysis study

The catalytic properties were carried out in an HEPES (4-(2-hydroxyethyl)-1-piperazineethanesulfonic acid) buffer solution (50 mM, pH = 8), which was prepared by dissolving 5.96 g of HEPES in 400 mL DI water. KOH pellets were added to adjust the pH of the buffer to 8 before adding water to make the 500 mL solution. The calibration curve for *p*-NP concentrations was plotted using UV-vis absorptions at 402 nm of various known concentrations (5, 10, 25, 50, 100  $\mu$ M) of *p*-NP solutions, which were prepared using HEPES buffer (50 mM, pH 8.0).

In a 100 mL beaker, 4.9 mg of *p*-NPA was dissolved in 2.5 mL of acetonitrile. Then, 47.5 mL of HEPES buffer (50 mM, pH = 8), and 10 mg of the catalyst was added to this solution. The absorbance at 402 nm of the mixture was measured with a UV-vis spectrometer every 5 minutes. The blank control was carried out under the same conditions without adding the catalyst.

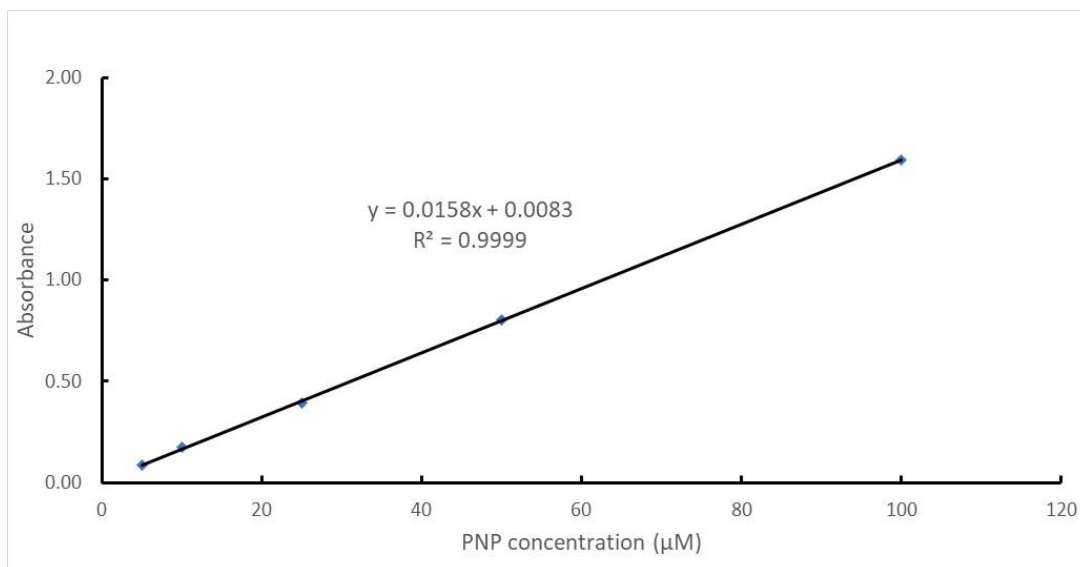

Fig. s5. Calibration curve of PNP.

## 7. FTIR

The FT-IR spectra were obtained on Spectra One spectrometer from a powder sample of 4000–400  $\text{cm}^{-1}$  range.

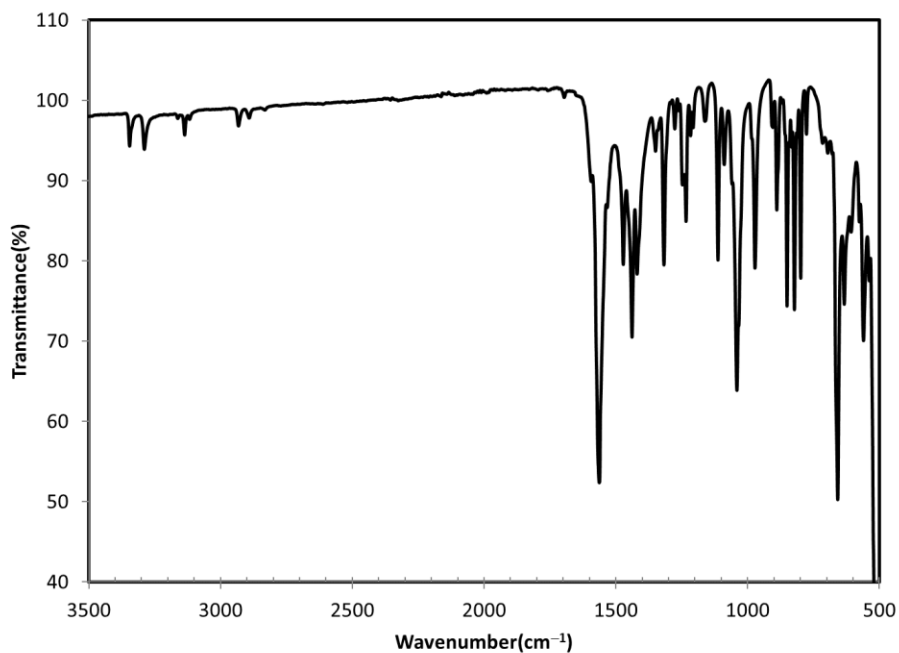

Fig s6, IR spectrum of compound [α-Cd(HIS)] (1)

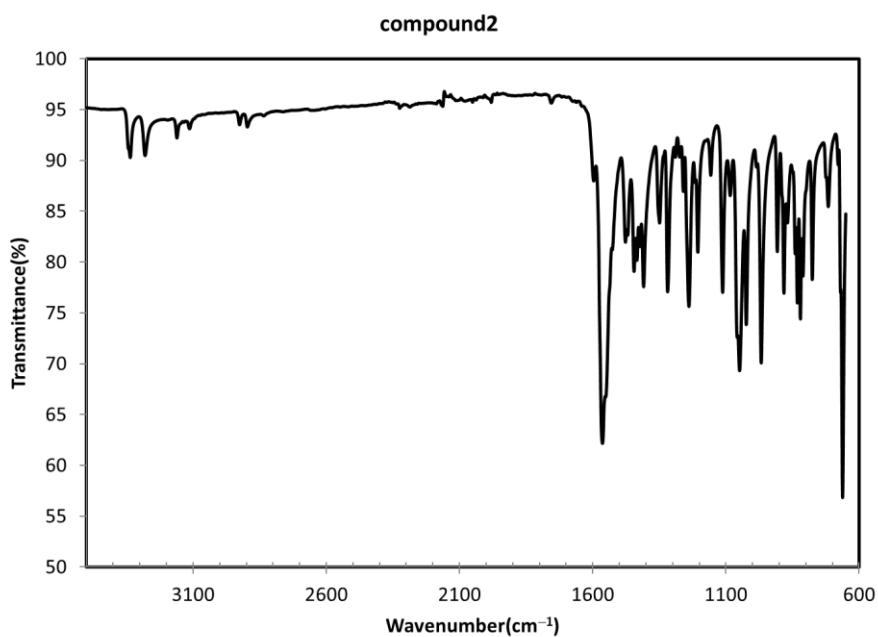

Fig s7, IR spectrum of [β-Cd(HIS)] (2)

## 8 Stability in buffer solution.

The stability of the catalyst in HEPES buffer (50 mM, pH 8.0) was evaluated. ~45 mg of the catalyst was added to 20.0 mL of HEPES buffer (50 mM, pH 8.0). The mixture was stirred at room temperature for 2 hours. Subsequently, the solids were separated by centrifugation, and dried at 120 °C for 12 hours for PXRD analysis.

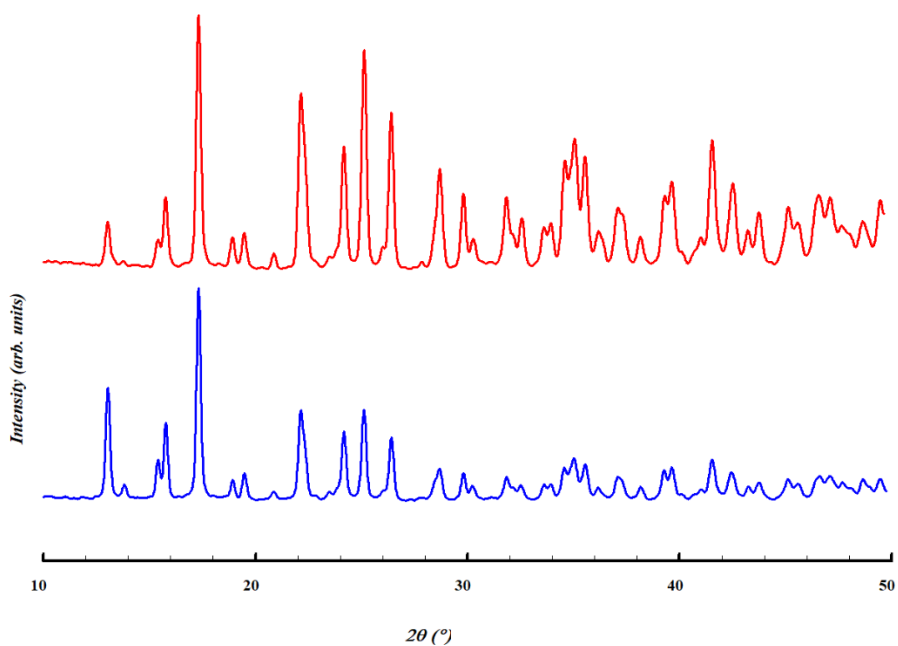

Fig. s8, Experimented PXRD of  $[\alpha\text{-Cd(HIS)}]$  (**1**) before (bottom, blue) and after (top, red) stirred in buffer solution.

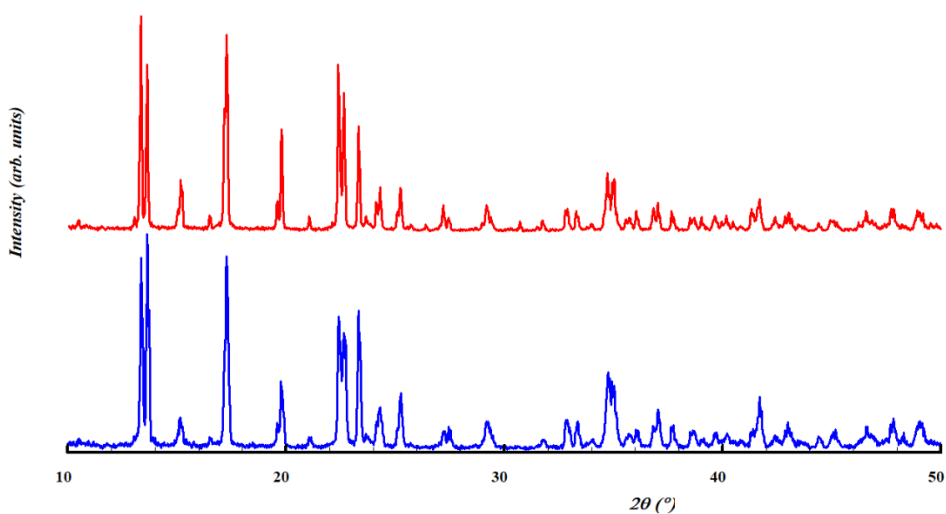

Fig. s9, Experimented PXRD of [ $\beta$ -Cd(HIS)] (2) before (bottom, blue) and after (top, red) stirred in buffer solution.

## 9. References

1. *SAINT Frame Integration Software*; Bruker AXS Inc.: Madison, WI, 2000.
2. Sheldrick, G. M. *SADABS, Siemens Area Detector Absorption (and other) Correction* Univ. of Göttinger, Göttinger, Germany, 1998.
3. *SHELXTL ver. 6.14, Reference Manual, Bruker Industrial Automation, Analytical Instrument*, Madison, WI 53719, 2000.
4. Sheldrick, G., A short history of SHELX. *Acta Crystallographica Section A* **2008**, *64* (1), 112-122.
5. Wilson, A. J. C., *International Tables for Crystallography, Vol C*. Kluwer Academic Publishers: Holland, 1995.
